# Supplementary material for: Expression of Phospholipase D Family Member 6 in Bovine Testes and Its Molecular Characteristics
Source: Preprints.org preprint supplement (doi:10.20944/preprints202306.2207.v1), 2023-06-30
Supplement: Supplementary file 1 [file supplementary]

# ConSurf Results

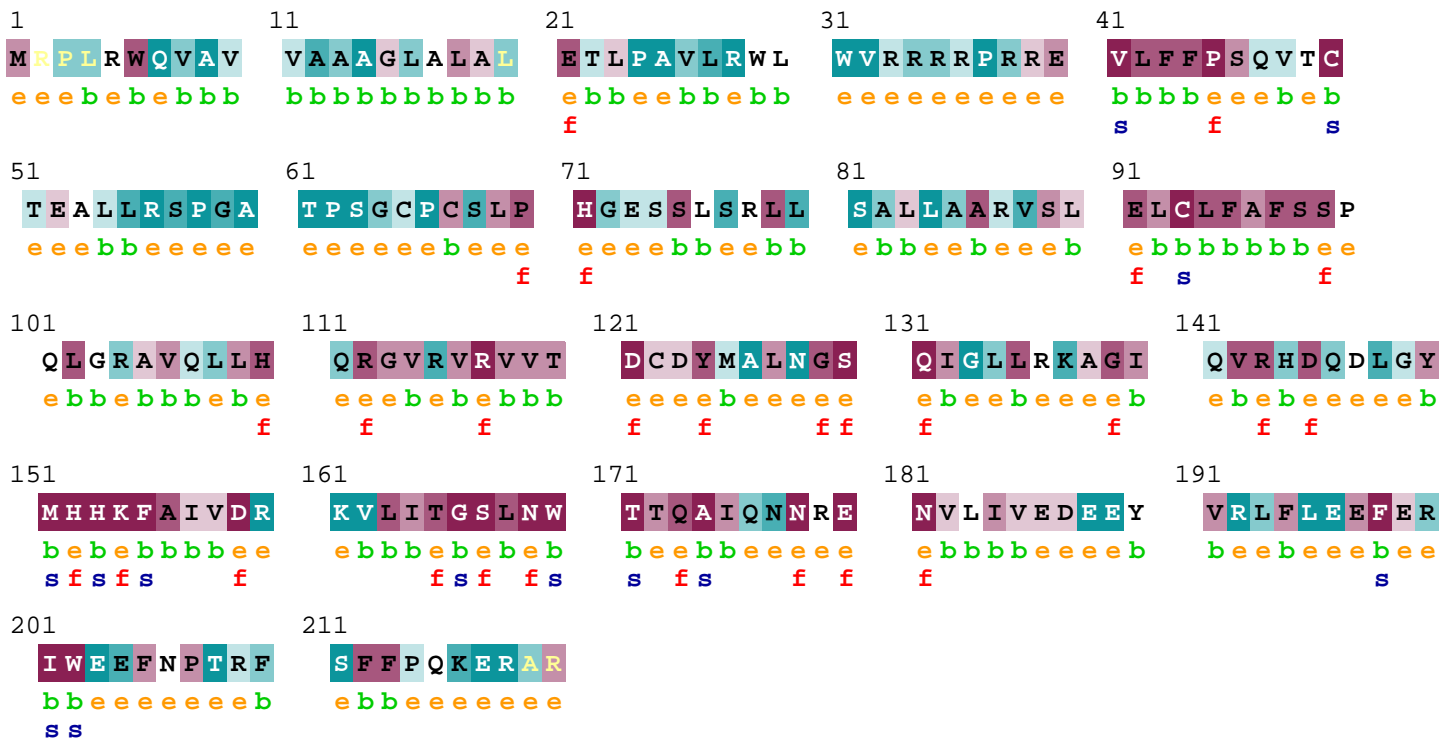

The conservation scale:

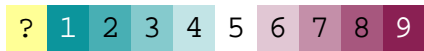

Variable Average Conserved

- e** - An exposed residue according to the neural-network algorithm.
- b** - A buried residue according to the neural-network algorithm.
- f** - A predicted functional residue (highly conserved and exposed).
- s** - A predicted structural residue (highly conserved and buried).
- \*** - Insufficient data - the calculation for this site was performed on less than 10% of the sequences.
