# Supplementary material for: Expression of Phospholipase D Family Member 6 in Bovine Testes and Its Molecular Characteristics
Source: Preprints.org preprint supplement (doi:10.20944/preprints202306.2207.v1), 2023-06-30
Supplement: Supplementary file 2 [file supplementary]

|            | 1                         | 10       | 20                        | 30                                        | 40        | 50 | 60 |
|------------|---------------------------|----------|---------------------------|-------------------------------------------|-----------|----|----|
| PLD6_BOVIN | M R P L R W Q V A V V A A | AGLALALE | T L P A V I R W L W V R R | R R P R R E V L F F P S Q V T C T E A L L | R S P C A |    |    |
| PLD6_MOUSE | M G R S S W R L V F A A G | AGLALALE | A L P W L M R W L L A . G | R R P R R E V L F F P S Q V T C T E A L L | Q A P G L |    |    |

|            | 70                          | 80                | 90            | 100                                                         | 110 |
|------------|-----------------------------|-------------------|---------------|-------------------------------------------------------------|-----|
| PLD6_BOVIN | T . . P S G C P C S L P H G | E S S L S R L L S | A L L A A R V | S L E L C L F A F S S P Q L G R A V Q L L H Q R G V R V R V |     |
| PLD6_MOUSE | P P G P S G C P C S L P H S | E S S L S R L L R | A L L A A R S | S L E L C L F A F S S P Q L G R A V Q L L H Q R G V R V R V |     |

|            | 120                                                                                 | 130                                 | 140 | 150 | 160 | 170 |
|------------|-------------------------------------------------------------------------------------|-------------------------------------|-----|-----|-----|-----|
| PLD6_BOVIN | V T D C D Y M A L N G S Q I G L L R K A G I Q V R H D Q D L G Y M H H K F A I V D R | K V L I T G S L N W T T Q A I Q N N |     |     |     |     |
| PLD6_MOUSE | I T D C D Y M A L N G S Q I G L L R K A G I Q V R H D Q D L G Y M H H K F A I V D R | K V L I T G S L N W T T Q A I Q N N |     |     |     |     |

|            | 180                                                     | 190                         | 200 | 210 | 220 |
|------------|---------------------------------------------------------|-----------------------------|-----|-----|-----|
| PLD6_BOVIN | R E N V L I V E D E E Y V R L F L E E F E R I W E E F N | P T R F S F F P Q K E R A R |     |     |     |
| PLD6_MOUSE | R E N V L I M E D E E Y V R L F L E E F E R I W E E F D | P T K Y S F F P Q K H R G H |     |     |     |
